# Supplementary material for: Whole Genome Sequencing of Mycobacterium tuberculosis under routine conditions in a high-burden area of multidrug-resistant tuberculosis in Peru
Source: PubMed Central journal article supplement (PMC11166294; doi:10.1371/journal.pone.0304130), 2024-06-11
Supplement: pone.0304130.s003.pdf [file pone.0304130.s003.pdf]

**S1 Table: Turnaround times for results by routine and WGS workflows.**

Times are measured from assignment of samples to the LRNM's routine workflow until the date in which the BACTEC MGIT results are issued to the patient or the WGS results are obtained and validated by the system.

| Method | Drug       | Times (days) |         |             |                |
|--------|------------|--------------|---------|-------------|----------------|
|        |            | Minimum      | Maximum | Mean (SD)   | Median (IQR)   |
| BACTEC | INH        | 22.4         | 71.7    | 35.5 (15.3) | 30.5 (25 – 34) |
|        | RIF        | 14.7         | 63.7    | 29.6 (7.4)  | 28.7 (23 – 34) |
|        | PZA        | 14.7         | 71.7    | 30.2 (8.8)  | 28.7 (24 – 33) |
|        | AMI        | 14.7         | 71.7    | 29.0 (6.8)  | 28.6 (24 – 33) |
|        | CAP        | 14.7         | 71.7    | 29.3 (7.7)  | 28.6 (24 – 33) |
|        | MFV        | 14.7         | 71.7    | 29.0 (6.8)  | 28.6 (24 – 33) |
|        | LEV        | 14.7         | 71.7    | 29.2 (7.1)  | 28.6 (24 – 33) |
|        | BDQ        | 27.7         | 118.7   | 53.2 (26.3) | 52.6 (28 – 69) |
|        | LZD        | 26.7         | 118.7   | 48.9 (25.9) | 43.6 (28 – 61) |
|        | CFZ        | 26.7         | 118.7   | 46.8 (26.4) | 31.7 (28 – 60) |
|        | DLM        | 26.7         | 118.7   | 46.8 (26.4) | 31.7 (28 – 60) |
| WGS    | All drugs* | 9.5          | 18.5    | 12.0 (2.2)  | 11.5 (9 – 13)  |

**WGS:** Whole Genome sequencing, **SD:** standard deviation, **IQR:** Interquartile range, **INH:** isoniazid, **RIF:** rifampicin, **PZA:** pyrazinamide, **LEV:** levofloxacin, **MFV:** moxifloxacin, **AMI:** amikacin, **CAP:** capreomycin, **DLM:** delamanid, **BDQ:** bedaquiline, **LZD:** linezolid, **CFZ:** clofazimine. \*13 drugs evaluated by the 2021 WHO catalogue.
