# Supplementary material for: Whole Genome Sequencing of Mycobacterium tuberculosis under routine conditions in a high-burden area of multidrug-resistant tuberculosis in Peru
Source: PubMed Central journal article supplement (PMC11166294; doi:10.1371/journal.pone.0304130), 2024-06-11
Supplement: pone.0304130.s004.pdf [file pone.0304130.s004.pdf]

**S2 Table: Agreement results between WGS and LPA GenoType MTBDRs/.**

Categorical and statistical agreements between the DST results of the WGS and the LPA GenoType MTBDRs/ were calculated for second-line anti-TB drugs.

| <b>Drug</b> | <b>Categorical agreement (%)</b> | <b>Positive agreement</b> | <b>Negative agreement</b> | <b>Kappa value (CI)</b> | <b>SE</b> |
|-------------|----------------------------------|---------------------------|---------------------------|-------------------------|-----------|
| MFX/LFX     | 97.9                             | 0.90                      | 0.98                      | 0.85 (0.67 - 1.00)      | 0.087     |
| AMI/KAN     | 100.0                            | 1.00                      | 1.00                      | 1.00 (1.00 - 1.00)      | 0.000     |
| CAP         | 95.0                             | 1.00                      | 0.95                      | 0.35 (-0.01 - 0.71)     | 0.182     |

**MFX:** Moxifloxacin, **LFX:** Levofloxacin, **AMI:** Amikacin, **KAN:** Kanamycin, **CAP:** Capreomycin, **CI:** 95% Confidence interval, **SE:** Standard error.
