# Supplementary material for: Whole Genome Sequencing of Mycobacterium tuberculosis under routine conditions in a high-burden area of multidrug-resistant tuberculosis in Peru
Source: PubMed Central journal article supplement (PMC11166294; doi:10.1371/journal.pone.0304130), 2024-06-11
Supplement: pone.0304130.s005.pdf [file pone.0304130.s005.pdf]

**S3 Table: Discrepant results between WGS and LPA GenoType MTBDRs/.**

In-depth analysis of DST discordant results between WGS and LPA GenoType MTBDRs/ for the fluoroquinolones (moxifloxacin and levofloxacin) and capreomycin drugs. The mutations detected by WGS are specified for each strain. Likewise, the annotation of the category of resistance association determined by the WHO mutation catalogue of 2021 is assigned. BACTEC results are added for comparison.

| Drug                      | LPA | WGS | BACTEC | Mutation          | WHO Category        |
|---------------------------|-----|-----|--------|-------------------|---------------------|
| Moxifloxacin/Levofloxacin |     |     |        |                   |                     |
| PER-TB-012                | R   | S   | S      | -                 |                     |
| PER-TB-103                | S   | R   | S      | <i>gyrB_D461N</i> | Assoc w R - Interim |
| PER-TB-107                | S   | R   | NA     | <i>gyrB_D461N</i> | Assoc w R - Interim |
| Capreomycin               |     |     |        |                   |                     |
| PER-TB-005                | S   | R   | R      | <i>tlyA_G232D</i> | Assoc w R - Interim |
| PER-TB-012                | S   | R   | R      | <i>tlyA_G232D</i> | Assoc w R - Interim |
| PER-TB-057                | S   | R   | R      | <i>tlyA_G232D</i> | Assoc w R - Interim |
| PER-TB-070                | S   | R   | R      | <i>tlyA_G232D</i> | Assoc w R - Interim |
| PER-TB-086                | S   | R   | R      | <i>tlyA_G232D</i> | Assoc w R - Interim |
| PER-TB-105                | S   | R   | NA     | <i>tlyA_G232D</i> | Assoc w R - Interim |
| PER-TB-129                | S   | R   | R      | <i>tlyA_G232D</i> | Assoc w R - Interim |

**LPA:** Line probe assay, **WGS:** Whole genome sequencing, **WHO:** World health organization, **Assoc w R – Interim:** Associated with resistance – Interim. **S:** sensible, **R:** resistant, **NA:** not available.
