# Supplementary material for: Whole Genome Sequencing of Mycobacterium tuberculosis under routine conditions in a high-burden area of multidrug-resistant tuberculosis in Peru
Source: PubMed Central journal article supplement (PMC11166294; doi:10.1371/journal.pone.0304130), 2024-06-11
Supplement: pone.0304130.s006.pdf [file pone.0304130.s006.pdf]

**S4 Table: Lineage distribution of Peruvian MTB strains.**

Lineages and sublineages determined in the MTB strains included in the study from Lima and Callao (MDR-TB hot-spot areas in Peru).

| <b>Lineage</b>            | <b>Sublineage</b> | <b>N</b>   | <b>%</b>   |
|---------------------------|-------------------|------------|------------|
| Lineage 2 (East-Asian)    | L2.2.1            | 3          | 2.1        |
| Lineage 4 (Euro-American) | L4                | 9          | 6.4        |
|                           | L4.1.1            | 5          | 3.6        |
|                           | L4.1.1.3          | 4          | 2.9        |
|                           | L4.1.2.1          | 23         | 16.4       |
|                           | L4.3.2            | 3          | 2.1        |
|                           | L4.3.3            | 69         | 49.3       |
|                           | L4.3.4.1          | 3          | 2.1        |
|                           | L4.3.4.2          | 6          | 4.3        |
|                           | L4.8              | 11         | 7.9        |
|                           | L4.9              | 1          | 0.7        |
| Mixed strains             | L4.3.3; L2.2.1    | 1          | 0.7        |
|                           | L4.3.3; L4.1.1    | 1          | 0.7        |
|                           | L4.3.3; L4.1.2.1  | 1          | 0.7        |
| <b>Total</b>              |                   | <b>140</b> | <b>100</b> |
